# Supplementary material for: Transmembrane protein CD69 acts as an S1PR1 agonist
Source: eLife journal article supplement (doi:10.7554/elife.88204), 2023-04-11
Supplement: supp [file elife-88204-supp-v1.zip]

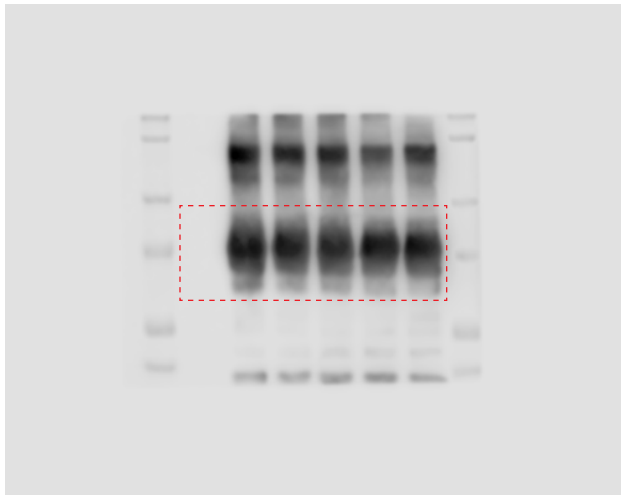

**S1PR1**

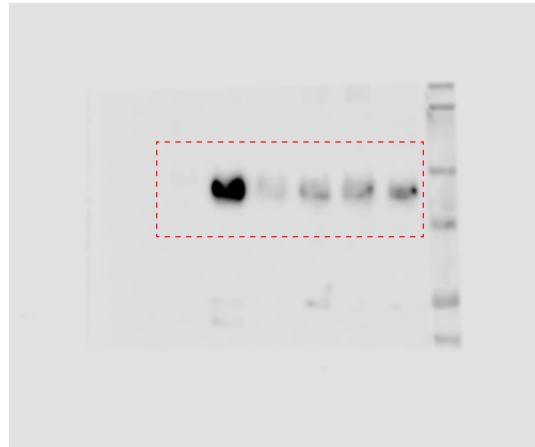

**CD69**

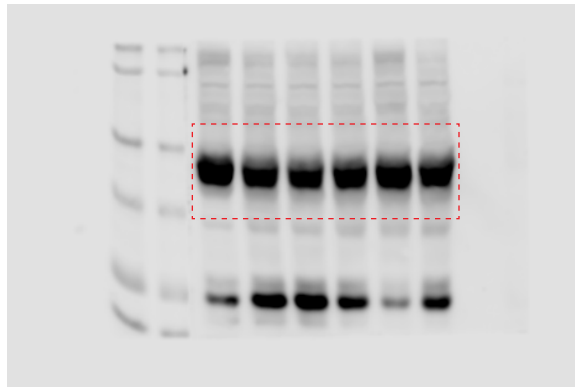

**CD69**

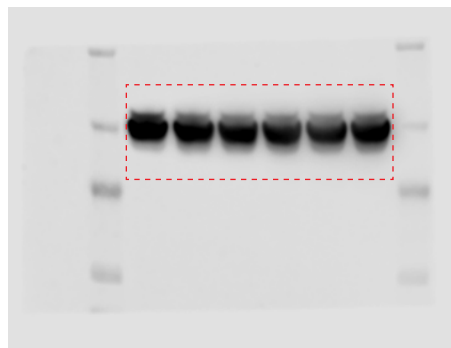

**Tubulin**
