# Supplementary material for: Transmembrane protein CD69 acts as an S1PR1 agonist
Source: eLife journal article supplement (doi:10.7554/elife.88204), 2023-04-11
Supplement: supp [file elife-88204-supp-v1.zip]

**CD69 (WT)**

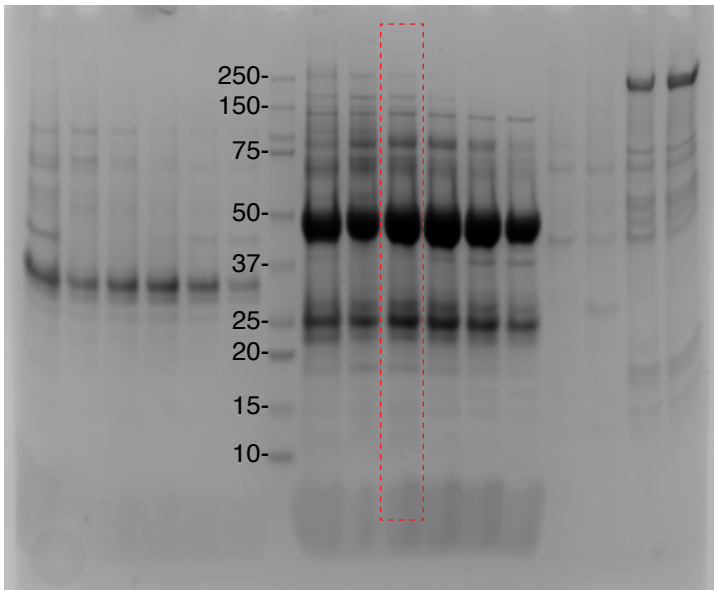

**CD69 (V48F/V49F)**

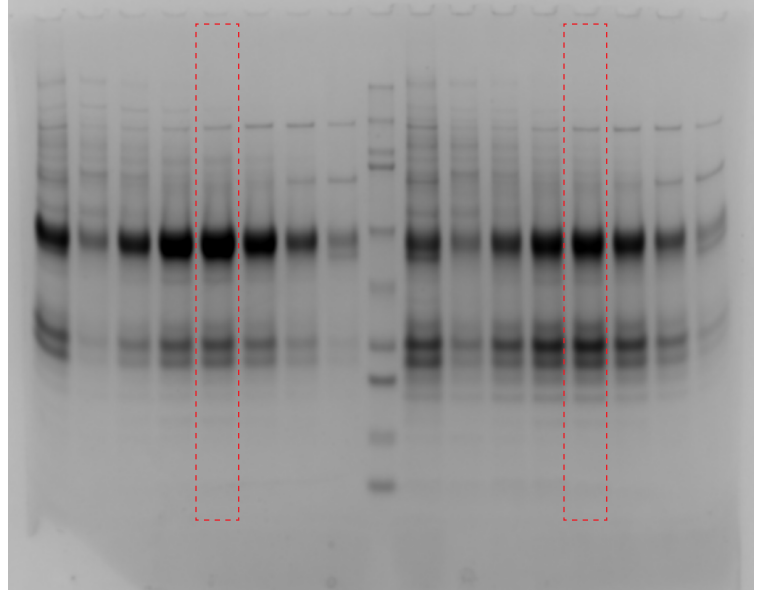

**CD69 (I56F/I59F)**
